# Supplementary material for: Separable Crossover-Promoting and Crossover-Constraining Aspects of Zip1 Activity during Budding Yeast Meiosis
Source: PubMed Central journal article supplement (PMC4482702; doi:10.1371/journal.pgen.1005335), 2015-06-26
Supplement: pgen.1005335.s008.pdf [file pgen.1005335.s008.pdf]

**S1 Table. Map distances measured in spores from *non-4* spore-viable tetrads**

| Strain                 | Interval (chromosome)     | #<br>Recombinant<br>Spores | Total<br>Spores | cM<br>(S.E.)    | % WT       |
|------------------------|---------------------------|----------------------------|-----------------|-----------------|------------|
| <i>S.c. ZIP1 MSH4</i>  | <i>HIS4-CEN3 (III)</i>    | 67                         | 274             | <b>24</b> (.03) | <b>100</b> |
|                        | <i>CEN3-MAT (III)</i>     | 58                         | 274             | <b>21</b> (.02) | <b>100</b> |
|                        | <i>MAT-RAD18 (III)</i>    | 92                         | 274             | <b>34</b> (.03) | <b>100</b> |
|                        | <i>RAD18-HMR (III)</i>    | 48                         | 274             | <b>18</b> (.02) | <b>100</b> |
|                        | <i>SPO11-SPO13 (VIII)</i> | 72                         | 274             | <b>26</b> (.03) | <b>100</b> |
|                        | <i>iLEU2- iTHR1 (XI)</i>  | 21                         | 274             | <b>8</b> (.02)  | <b>100</b> |
| <i>S.c. ZIP1 msh4Δ</i> | <i>HIS4-CEN3 (III)</i>    | 70                         | 1066            | <b>7</b> (.01)  | <b>29</b>  |
|                        | <i>CEN3-MAT (III)</i>     | 75                         | 1066            | <b>7</b> (.01)  | <b>33</b>  |
|                        | <i>MAT-RAD18 (III)</i>    | 168                        | 1066            | <b>16</b> (.01) | <b>47</b>  |
|                        | <i>RAD18-HMR (III)</i>    | 115                        | 1066            | <b>11</b> (.01) | <b>61</b>  |
|                        | <i>SPO11-SPO13 (VIII)</i> | 131                        | 1066            | <b>12</b> (.01) | <b>46</b>  |
|                        | <i>iLEU2- iTHR1 (XI)</i>  | 59                         | 1066            | <b>6</b> (.01)  | <b>75</b>  |
| <i>K.l. ZIP1 MSH4</i>  | <i>HIS4-CEN3 (III)</i>    | 348                        | 1498            | <b>23</b> (.01) | <b>96</b>  |
|                        | <i>CEN3-MAT (III)</i>     | 371                        | 1498            | <b>25</b> (.01) | <b>119</b> |
|                        | <i>MAT-RAD18 (III)</i>    | 334                        | 1498            | <b>22</b> (.01) | <b>65</b>  |
|                        | <i>RAD18-HMR (III)</i>    | 298                        | 1498            | <b>20</b> (.01) | <b>111</b> |
|                        | <i>SPO11-SPO13 (VIII)</i> | 420                        | 1498            | <b>28</b> (.01) | <b>108</b> |
|                        | <i>iLEU2- iTHR1 (XI)</i>  | 135                        | 1498            | <b>9</b> (.01)  | <b>113</b> |
| <i>K.l. ZIP1 msh4Δ</i> | <i>HIS4-CEN3 (III)</i>    | 344                        | 1804            | <b>19</b> (.01) | <b>79</b>  |
|                        | <i>CEN3-MAT (III)</i>     | 336                        | 1804            | <b>19</b> (.01) | <b>90</b>  |
|                        | <i>MAT-RAD18 (III)</i>    | 368                        | 1804            | <b>20</b> (.01) | <b>59</b>  |
|                        | <i>RAD18-HMR (III)</i>    | 297                        | 1804            | <b>16</b> (.01) | <b>89</b>  |
|                        | <i>SPO11-SPO13 (VIII)</i> | 492                        | 1804            | <b>27</b> (.01) | <b>104</b> |
|                        | <i>iLEU2- iTHR1 (XI)</i>  | 167                        | 1804            | <b>9</b> (.01)  | <b>113</b> |
