# Supplementary material for: Separable Crossover-Promoting and Crossover-Constraining Aspects of Zip1 Activity during Budding Yeast Meiosis
Source: PubMed Central journal article supplement (PMC4482702; doi:10.1371/journal.pgen.1005335), 2015-06-26
Supplement: pgen.1005335.s009.pdf [file pgen.1005335.s009.pdf]

**S2 Table. Distribution of crossover types among all spores**

| Chromosome III<br>genotype          | <i>S. c. ZIP1</i> |             | <i>K.I. ZIP1</i> |             | <i>S. c. ZIP1<br/>msh4Δ</i> |             | <i>K.I. ZIP1 msh4Δ</i> |             |
|-------------------------------------|-------------------|-------------|------------------|-------------|-----------------------------|-------------|------------------------|-------------|
|                                     | #<br>spores       | %<br>total  | #<br>spores      | %<br>total  | #<br>spores                 | %<br>total  | #<br>spores            | %<br>total  |
| <b>Total number of spores</b>       | <b>2341</b>       |             | <b>3249</b>      |             | <b>3636</b>                 |             | <b>4383</b>            |             |
| <b>Parental</b>                     | 730               | <b>31.2</b> | 1162             | <b>35.8</b> | 2051                        | <b>56.4</b> | 1883                   | <b>43.0</b> |
| <b>Single CO</b>                    |                   |             |                  |             |                             |             |                        |             |
| <i>HIS4-CEN3</i>                    | 230               | 9.8         | 334              | 10.3        | 191                         | 5.3         | 344                    | 7.8         |
| <i>CEN3-MAT</i>                     | 168               | 7.2         | 389              | 12.0        | 186                         | 5.1         | 492                    | 11.2        |
| <i>MAT-RAD18</i>                    | 450               | 19.2        | 351              | 10.8        | 604                         | 16.6        | 471                    | 10.7        |
| <i>RAD18-HMR</i>                    | 225               | 9.6         | 326              | 10.0        | 384                         | 10.6        | 437                    | 10.0        |
| <b>total % single CO</b>            |                   | <b>45.8</b> |                  | <b>43.1</b> |                             | <b>37.5</b> |                        | <b>39.8</b> |
| <b>Double CO</b>                    |                   |             |                  |             |                             |             |                        |             |
| <i>HIS4-CEN3; MAT-RAD</i>           | 127               | 5.4         | 95               | 2.9         | 47                          | 1.3         | 118                    | 2.7         |
| <i>HIS4-CEN3; RAD18-HMR</i>         | 83                | 3.5         | 68               | 2.1         | 22                          | 0.6         | 108                    | 2.5         |
| <i>HIS4-CEN3; CEN3-MAT</i>          | 55                | 2.3         | 113              | 3.5         | 28                          | 0.8         | 114                    | 2.6         |
| <i>CEN3-MAT; MAT-RAD18</i>          | 58                | 2.5         | 115              | 3.5         | 25                          | 0.7         | 105                    | 2.4         |
| <i>CEN3-MAT; RAD18-HMR</i>          | 51                | 2.2         | 99               | 3.0         | 26                          | 0.7         | 125                    | 2.9         |
| <i>MAT-RAD18; RAD18-HMR</i>         | 62                | 2.6         | 79               | 2.4         | 52                          | 1.4         | 77                     | 1.8         |
| <i>HIS4-CEN3; MAT-RAD18</i>         | 12                | 0.5         | 4                | 0.1         | 1                           | 0.0         | 0                      | 0.0         |
| <b>total % double CO</b>            |                   | <b>19.1</b> |                  | <b>17.6</b> |                             | <b>5.5</b>  |                        | <b>14.8</b> |
| <b>Triple CO</b>                    |                   |             |                  |             |                             |             |                        |             |
| <i>HIS4-CEN3-MAT-RAD18</i>          | 34                | 1.5         | 23               | 0.7         | 3                           | 0.1         | 25                     | 0.6         |
| <i>CEN3-MAT-RAD18-HMR</i>           | 12                | 0.5         | 23               | 0.7         | 4                           | 0.1         | 22                     | 0.5         |
| <i>HIS4-CEN3-MAT;<br/>RAD18-HMR</i> | 17                | 0.7         | 24               | 0.7         | 7                           | 0.2         | 28                     | 0.6         |
| <i>HIS4-CEN3;<br/>MAT-RAD18-HMR</i> | 24                | 1.0         | 36               | 1.1         | 3                           | 0.1         | 28                     | 0.6         |
| <b>total % triple CO</b>            |                   | <b>3.7</b>  |                  | <b>3.3</b>  |                             | <b>0.5</b>  |                        | <b>2.3</b>  |
| <b>Quadruple CO</b>                 |                   |             |                  |             |                             |             |                        |             |
| <i>HIS4-CEN3-MAT-RAD18-<br/>HMR</i> | 3                 | <b>0.1</b>  | 8                | <b>0.2</b>  | 2                           | <b>0.1</b>  | <b>6</b>               | <b>0.1</b>  |
