# Supplementary material for: Separable Crossover-Promoting and Crossover-Constraining Aspects of Zip1 Activity during Budding Yeast Meiosis
Source: PubMed Central journal article supplement (PMC4482702; doi:10.1371/journal.pgen.1005335), 2015-06-26
Supplement: pgen.1005335.s010.pdf [file pgen.1005335.s010.pdf]

**S3 Table. Spore viability of *S. cerevisiae* or *K. lactis* ZIP1 crossover strains**

| Strain                 | Tetrads dissected | 4 spore viable | 3 spore viable | 2 spore viable | 1 spore viable | 0 spore viable | Spore viability % |
|------------------------|-------------------|----------------|----------------|----------------|----------------|----------------|-------------------|
| <i>S.c. ZIP1 MSH4</i>  | 616               | 528            | 54             | 29             | 5              | 0              | <b>95</b>         |
| <i>S.c. ZIP1msh4Δ</i>  | 1650              | 640            | 284            | 328            | 194            | 204            | <b>65</b>         |
| <i>K.l. ZIP1 MSH4</i>  | 2443              | 1065           | 537            | 485            | 201            | 155            | <b>72</b>         |
| <i>K.l. ZIP1 msh4Δ</i> | 1596              | 629            | 314            | 331            | 175            | 147            | <b>67</b>         |
