# Supplementary material for: Separable Crossover-Promoting and Crossover-Constraining Aspects of Zip1 Activity during Budding Yeast Meiosis
Source: PubMed Central journal article supplement (PMC4482702; doi:10.1371/journal.pgen.1005335), 2015-06-26
Supplement: pgen.1005335.s012.pdf [file pgen.1005335.s012.pdf]

**S5 Table. “Interference ratio”: Measure the influence of recombination in one interval on the map distance of an adjacent interval on chromosome III.**

| Genotype              | Reference Interval | Test Interval | HIS4- CEN3        |                   | CEN3-MAT          |                   |                   | MAT-RAD18         |                   |                   | RAD18-HMR         |                   |                   |
|-----------------------|--------------------|---------------|-------------------|-------------------|-------------------|-------------------|-------------------|-------------------|-------------------|-------------------|-------------------|-------------------|-------------------|
|                       |                    |               | CEN3- MAT         | MAT-RAD18         | HIS4-CEN3         | MAT-RAD18         | RAD18-HMR         | HIS4-CEN3         | CEN3- MAT         | RAD18-HMR         | HIS4-CEN3         | CEN3- MAT         | MAT-RAD18         |
| <b>S. c. ZIP1</b>     |                    |               |                   |                   |                   |                   |                   |                   |                   |                   |                   |                   |                   |
| YT131                 | <i>PD</i>          | P:N:T         | 169:0:86          | 102:9:141         | 169:6:159         | 95:15:227         | 194:5:138         | 102:2:83          | 95:2:90           | 70:1:116          | 151:5:134         | 194:1:96          | 70:11:210         |
|                       | <b>cM ± SE</b>     |               | <b>16.9 ±1.5</b>  | <b>38.7 ±3.5</b>  | <b>29.2 ±2.4</b>  | <b>47.0 ±3.2</b>  | <b>24.9 ±2.3</b>  | <b>25.4 ±2.8</b>  | <b>27.3 ±2.8</b>  | <b>32.6 ±2.3</b>  | <b>28.3 ±2.6</b>  | <b>17.5 ±1.7</b>  | <b>47.4 ±3.2</b>  |
|                       | <i>TT+NPD</i>      | P:N:T         | 165:3:68          | 85:5:142          | 86:2:69           | 92:1:61           | 97:0:57           | 150:6:141         | 242:1:61          | 221:4:79          | 103:3:93          | 143:2:55          | 117:5:78          |
|                       | <b>cM ± SE</b>     |               | <b>18.2 ±2.6</b>  | <b>37.1 ±3.0</b>  | <b>25.8 ±3.2</b>  | <b>21.8 ±2.7</b>  | <b>18.5 ±2.0</b>  | <b>29.8 ±2.7</b>  | <b>11.0 ±1.5</b>  | <b>16.9 ±2.3</b>  | <b>27.9 ±3.0</b>  | <b>16.8 ±2.6</b>  | <b>27.0 ±3.5</b>  |
|                       | <b>ratio</b>       |               | <b>1.08</b>       | <b>0.96</b>       | <b>0.88</b>       | <b>0.46</b>       | <b>0.74</b>       | <b>1.17</b>       | <b>0.4</b>        | <b>0.52</b>       | <b>0.99</b>       | <b>0.96</b>       | <b>0.57</b>       |
|                       | $X^2 P$            |               | 0.11              | 0.39              | 0.66              | <0.0001           | 0.2               | 0.54              | <0.0001           | <0.0001           | 0.98              | 0.30              | <0.0001           |
|                       | Sig. SE (cM)       |               | no                | no                | no                | yes               | yes               | no                | yes               | yes               | no                | no                | yes               |
| <b>S.c. ZIP1 msh4</b> |                    |               |                   |                   |                   |                   |                   |                   |                   |                   |                   |                   |                   |
| AM3313                | <i>PD</i>          | P:N:T         | 436:2:74          | 292:12:194        | 436:2:79          | 294:10:209        | 372:5:133         | 292:2:60          | 294:3:65          | 237:5:116         | 367:1:65          | 372:1:61          | 237:11:186        |
|                       | <b>cM ± SE</b>     |               | <b>8.4 ±1.1</b>   | <b>26.7 ±2.2</b>  | <b>8.8 ±1.1</b>   | <b>26.2 ±2.0</b>  | <b>16.0 ±1.6</b>  | <b>10.2 ±1.5</b>  | <b>11.5 ±1.7</b>  | <b>20.4 ±2.2</b>  | <b>8.2 ±1.1</b>   | <b>7.7 ±1.1</b>   | <b>29.0 ±2.4</b>  |
|                       | <i>TT+NPD</i>      | P:N:T         | 81:1:13           | 62:0:30           | 76:1:11           | 68:2:21           | 62:2:26           | 206:1:29          | 219:0:23          | 197:2:43          | 137:2:23          | 138:1:27          | 121:1:44          |
|                       | <b>cM ± SE</b>     |               | <b>10 ±3.5</b>    | <b>16.3 ±2.4</b>  | <b>9.7 ±3.8</b>   | <b>18.1 ±5.0</b>  | <b>21.1 ±5.0</b>  | <b>7.4 ±1.6</b>   | <b>4.8 ±0.9</b>   | <b>11.4 ±2.1</b>  | <b>10.8 ±2.9</b>  | <b>9.9 ±2.3</b>   | <b>15.1 ±2.4</b>  |
|                       | <b>ratio</b>       |               | <b>1.23</b>       | <b>0.61</b>       | <b>1.1</b>        | <b>0.69</b>       | <b>1.32</b>       | <b>0.73</b>       | <b>0.42</b>       | <b>0.56</b>       | <b>1.32</b>       | <b>1.29</b>       | <b>0.52</b>       |
|                       | $X^2 P$            |               | 0.69              | 0.13              | 0.53              | 0.01              | 0.49              | 0.29              | <b>0.005</b>      | <b>0.0002</b>     | 0.30              | 0.61              | <b>0.0002</b>     |
|                       | Sig. SE (cM)       |               | no                | yes               | no                | no                | no                | no                | yes               | yes               | no                | no                | yes               |
| <b>K.I. ZIP1</b>      |                    |               |                   |                   |                   |                   |                   |                   |                   |                   |                   |                   |                   |
| YT125                 | <i>PD</i>          | P:N:T         | 164:3:119         | 151:3:111         | 164:7:102         | 159:4:102         | 154:4:104         | 151:1:106         | 159:7:102         | 164:3:103         | 163:7:118         | 154:7:118         | 164:4:115         |
|                       | <b>cM ± SE</b>     |               | <b>24.0 ±2.2</b>  | <b>24.3 ±2.4</b>  | <b>26.4 ±3.1</b>  | <b>23.8 ±2.6</b>  | <b>24.4 ±2.6</b>  | <b>21.7 ±1.9</b>  | <b>26.9 ±3.1</b>  | <b>22.4 ±2.3</b>  | <b>27.8 ±2.9</b>  | <b>28.7 ±3.0</b>  | <b>24.6 ±2.4</b>  |
|                       | <i>TT+NPD</i>      | P:N:T         | 109:5:78          | 107:3:72          | 122:1:82          | 109:2:87          | 125:3:69          | 114:5:70          | 106:2:87          | 119:4:72          | 110:1:72          | 108:2:70          | 106:2:74          |
|                       | <b>cM ± SE</b>     |               | <b>28.1 ±3.7</b>  | <b>24.7 ±3.2</b>  | <b>21.6 ±2.2</b>  | <b>25.0 ±2.6</b>  | <b>22.1 ±3.0</b>  | <b>26.5 ±3.7</b>  | <b>25.4 ±2.7</b>  | <b>24.6 ±3.3</b>  | <b>21.3 ±2.4</b>  | <b>22.8 ±2.8</b>  | <b>23.6 ±2.8</b>  |
|                       | <b>ratio</b>       |               | <b>1.17</b>       | <b>1.02</b>       | <b>0.82</b>       | <b>1.05</b>       | <b>0.91</b>       | <b>1.22</b>       | <b>0.94</b>       | <b>1.1</b>        | <b>0.78</b>       | <b>0.79</b>       | <b>0.96</b>       |
|                       | $X^2 P$            |               | 0.43              | 0.81              | 0.20              | 0.47              | 0.59              | 0.10              | 0.21              | 0.70              | 0.27              | 0.40              | 0.96              |
|                       | Sig. SE (cM)       |               | no                | no                | no                | no                | no                | no                | no                | no                | no                | no                | no                |
| <b>K.I. ZIP1 msh4</b> |                    |               |                   |                   |                   |                   |                   |                   |                   |                   |                   |                   |                   |
|                       | <i>PD</i>          | P:N:T         | 351:10:251        | 370:15:200        | 351:8:209         | 331:13:205        | 351:11:207        | 370:8:195         | 351:15:239        | 367:9:232         | 375:10:218        | 351:14:247        | 367:18:231        |
|                       | <b>cM ± SE</b>     |               | <b>25.4 ± 1.7</b> | <b>24.8 ± 2.1</b> | <b>22.6 ± 1.7</b> | <b>25.8 ± 2.1</b> | <b>24.0 ± 1.9</b> | <b>21.2 ± 1.7</b> | <b>27.2 ± 2.0</b> | <b>23.5 ± 1.7</b> | <b>23.1 ± 1.8</b> | <b>27.0 ± 2.0</b> | <b>27.5 ± 2.1</b> |
|                       | <i>TT+NPD</i>      | P:N:T         | 217:11:122        | 202:5:122         | 261:12:121        | 254:8:131         | 261:2:128         | 215:7:121         | 218:7:132         | 249:5:105         | 225:5:112         | 218:8:122         | 241:3:107         |
|                       | <b>cM ± SE</b>     |               | <b>26.9 ± 2.9</b> | <b>23.1 ± 2.3</b> | <b>24.5 ± 2.7</b> | <b>22.8 ± 2.3</b> | <b>17.9 ± 1.6</b> | <b>23.8 ± 2.5</b> | <b>24.4 ± 2.4</b> | <b>18.8 ± 2.1</b> | <b>20.1 ± 2.2</b> | <b>24.4 ± 2.6</b> | <b>17.8 ± 1.9</b> |
|                       | <b>ratio</b>       |               | <b>1.06</b>       | <b>0.93</b>       | <b>1.08</b>       | <b>0.88</b>       | <b>0.75</b>       | <b>1.12</b>       | <b>0.9</b>        | <b>0.8</b>        | <b>0.87</b>       | <b>0.9</b>        | <b>0.65</b>       |
|                       | $X^2 P$            |               | 0.07              | 0.43              | 0.04              | 0.40              | 0.07              | 0.68              | 0.61              | 0.02              | 0.54              | 0.26              | <b>0.005</b>      |
|                       | Sig. SE (cM)       |               | no                | no                | no                | no                | yes               | no                | no                | no                | no                | no                | yes               |
