# Supplementary material for: Separable Crossover-Promoting and Crossover-Constraining Aspects of Zip1 Activity during Budding Yeast Meiosis
Source: PubMed Central journal article supplement (PMC4482702; doi:10.1371/journal.pgen.1005335), 2015-06-26
Supplement: pgen.1005335.s013.pdf [file pgen.1005335.s013.pdf]

**S6 Table. Strains used in this study**

|                | <b>GENOTYPE</b>                                                                                                                                                                                                                                                                            |
|----------------|--------------------------------------------------------------------------------------------------------------------------------------------------------------------------------------------------------------------------------------------------------------------------------------------|
| <b>YAM1252</b> | <i>lys2ΔNhe his4-260,519 leu2-3,112 MATα trp1-289 S.c. ZIP1 ura3-1 thr1-4 ade2-1</i><br><i>lys2ΔNhe his4-260,519 leu2-3,112 MATα trp1-289 S.c. ZIP1 ura3-1 thr1-4 ade2-1</i>                                                                                                               |
| <b>CO9</b>     | <i>lys2ΔNhe his4-260,519 leu2-3,112 MATα trp1-289 K.l. ZIP1 ura3-1 thr1-4 ade2-1</i><br><i>lys2ΔNhe his4-260,519 leu2-3,112 MATα trp1-289 K.l. ZIP1 ura3-1 thr1-4 ade2-1</i><br><br>YAM1252 with <i>K. lactis</i> ZIP1 ORF in place of the <i>S. cerevisiae</i> ZIP1 ORF on chromosome IV. |
| <b>CO10</b>    | YAM1252 homozygous <i>zip1::URA3</i>                                                                                                                                                                                                                                                       |
| <b>CO7</b>     | YAM1252 <i>S. cerevisiae</i> ZIP1/ <i>zip1::URA3</i>                                                                                                                                                                                                                                       |
| <b>CO11</b>    | YAM1252 <i>K.lactis</i> ZIP1/ <i>zip1::URA3</i>                                                                                                                                                                                                                                            |
| <b>CO33</b>    | YAM1252 <i>S. cerevisiae</i> ZIP1/ <i>K.lactis</i> ZIP1                                                                                                                                                                                                                                    |
| <b>AM2715</b>  | YAM1252 homozygous <i>pch2::TRP1</i>                                                                                                                                                                                                                                                       |
| <b>AM3340</b>  | CO10 homozygous <i>pch2::hphMX4</i>                                                                                                                                                                                                                                                        |
| <b>AM2713</b>  | CO11 homozygous <i>pch2::TRP1</i>                                                                                                                                                                                                                                                          |
| <b>K292</b>    | YAM1252 <i>ndt80::LEU2 ECM11-cMYC::kanMX4 HIS4 hphMX4@CEN3 ADE2@RAD18</i><br><i>ndt80::LEU2 ECM11 his4-260,519 CEN3 RAD18</i>                                                                                                                                                              |
| <b>K268</b>    | CO9 homozygous <i>ndt80::LEU2</i> and <i>ECM11/ECM11-cMYC::kanMX4</i>                                                                                                                                                                                                                      |
| <b>AM3356</b>  | CO9 <i>K.lactis</i> ZIP1-V5 (tagged between R472 S473)                                                                                                                                                                                                                                     |
| <b>AM2712</b>  | YAM1252 <i>ECM11-cMYC::kanMX4 ndt80::LEU2</i><br><i>ECM11-cMYC::kanMX4 ndt80::LEU2</i>                                                                                                                                                                                                     |
| <b>AM2711</b>  | CO9 <i>ECM11-cMYC::kanMX4 ndt80::LEU2</i><br><i>ECM11-cMYC::kanMX4 ndt80::LEU2</i>                                                                                                                                                                                                         |
| <b>AM2784</b>  | CO10 <i>ECM11-cMYC::kanMX4 ndt80::LEU2</i><br><i>ECM11-cMYC::kanMX4 ndt80::LEU2</i>                                                                                                                                                                                                        |
| <b>K375</b>    | YAM1252 <i>ndt80::LEU2 ZIP3-cMYC HIS4 hphMX4@CEN3</i><br><i>ndt80::LEU2 ZIP3 his4-260,519 CEN3</i>                                                                                                                                                                                         |
| <b>YT12</b>    | CO9 homozygous <i>ndt80::LEU2</i> and <i>ZIP3/ZIP3-cMYC</i>                                                                                                                                                                                                                                |
| <b>AM3362</b>  | YAM1252 <i>ZIP4-HA/ZIP4 ZIP3/ZIP3-cMYC</i>                                                                                                                                                                                                                                                 |
| <b>AM3361</b>  | CO9 <i>ZIP4-HA/ZIP4 ZIP3/ZIP3-cMYC</i>                                                                                                                                                                                                                                                     |
| <b>AM3363</b>  | CO10 <i>ZIP4-HA/ZIP4 ZIP3/ZIP3-cMYC ndt80::LEU2/NDT80</i>                                                                                                                                                                                                                                  |
| <b>CO58</b>    | CO9 homozygous <i>CTF19-cMYC::kanMX4</i>                                                                                                                                                                                                                                                   |
| <b>YT14</b>    | CO9 homozygous <i>spo11::ADE2 CTF19-cMYC::kanMX4</i>                                                                                                                                                                                                                                       |
| <b>YT15</b>    | YAM1252 homozygous <i>spo11::ADE2 CTF19-cMYC::kanMX4</i>                                                                                                                                                                                                                                   |
| <b>YT21</b>    | CO10 homozygous <i>spo11::ADE2 CTF19-cMYC::kanMX4</i>                                                                                                                                                                                                                                      |
| <b>YT24</b>    | <i>lys2ΔNhe his4-260,519 leu2-3,112 MATα trp1-289 ura3-1 spo11::ADE2</i><br><i>MATα@THR1 ade2-1 CTF19-cMYC::kanMX4</i>                                                                                                                                                                     |
| <b>YT23</b>    | YT24 <i>K.lactis</i> ZIP1                                                                                                                                                                                                                                                                  |

|               |                                                                                                                                                                                                                                                                                                                                                                                                                                                                |
|---------------|----------------------------------------------------------------------------------------------------------------------------------------------------------------------------------------------------------------------------------------------------------------------------------------------------------------------------------------------------------------------------------------------------------------------------------------------------------------|
| <b>YT25</b>   | YT24 <i>zip1::URA3</i>                                                                                                                                                                                                                                                                                                                                                                                                                                         |
| <b>YAM538</b> | YT24 <i>SPO11</i>                                                                                                                                                                                                                                                                                                                                                                                                                                              |
| <b>AM2840</b> | YT23 <i>SPO11</i>                                                                                                                                                                                                                                                                                                                                                                                                                                              |
| <b>AM2841</b> | YAM538 <i>zip1::LYS2</i>                                                                                                                                                                                                                                                                                                                                                                                                                                       |
| <b>K530</b>   | YAM1252 <u><i>HIS4</i></u> <u><i>leu2-Cla</i></u> <u><i>hphMX4@CEN3 MATa</i></u><br><i>his4-260,519 leu2-3,112 CEN3 MATa</i><br><br><u><i>CEN8</i></u> <u><i>spo13::URA3</i></u> <u><i>arg4-BglII</i></u> <u><i>thr1-4</i></u><br><i>TRP1@CEN8 SPO13 arg4-Nsp THR1</i>                                                                                                                                                                                         |
| <b>K531</b>   | K530 homozygous <i>K.lactis ZIP1</i>                                                                                                                                                                                                                                                                                                                                                                                                                           |
| <b>K533</b>   | K530 homozygous <i>zip1::URA3</i>                                                                                                                                                                                                                                                                                                                                                                                                                              |
| <b>YT131</b>  | <u><i>HIS4</i></u> <u><i>leu2-3,112</i></u> <u><i>hphMX4@CEN3 MATa</i></u> <u><i>ADE2@RAD18</i></u> <u><i>natMX4@HMR</i></u> <u><i>trp1-289</i></u><br><i>his4-260,519 leu2-3,112 CEN3 MATa RAD18 HMR trp1-289</i><br><br><u><i>ura3-1</i></u> <u><i>SPO11</i></u> <u><i>spo13::URA3</i></u> <u><i>thr1-4</i></u> <u><i>LEU2@ChrmXI 152kb</i></u> <u><i>192kb</i></u> <u><i>ade2-1</i></u><br><i>ura3-1 TRP1MX4@SPO11 SPO13 thr1-4 152kb THR1@193kb ade2-1</i> |
| <b>YT125</b>  | YT131 homozygous <i>K.lactis ZIP1</i>                                                                                                                                                                                                                                                                                                                                                                                                                          |
| <b>AM3313</b> | YT131 homozygous <i>msh4::ADE2</i>                                                                                                                                                                                                                                                                                                                                                                                                                             |
| <b>YT152</b>  | YT131 homozygous <i>K.lactis ZIP1 msh4::ADE2</i>                                                                                                                                                                                                                                                                                                                                                                                                               |
| <b>K479</b>   | YAM1252 <u><i>HIS4</i></u> <u><i>leu2-CUP1</i></u> <u><i>TRP1@CEN3 MATa</i></u> <u><i>cup1</i></u><br><i>his4-260,519 leu2-3,112 CEN3 MATa CUP1</i><br><i>MATa-bearing chromosome III is circular</i>                                                                                                                                                                                                                                                          |
| <b>K457</b>   | K479 homozygous <i>K.lactis ZIP1</i>                                                                                                                                                                                                                                                                                                                                                                                                                           |
| <b>TY521</b>  | K479 homozygous <i>zip1::LEU2</i>                                                                                                                                                                                                                                                                                                                                                                                                                              |
| <b>K536</b>   | K479 homozygous <i>mms4::natMX4</i>                                                                                                                                                                                                                                                                                                                                                                                                                            |
| <b>K521</b>   | K457 homozygous <i>mms4::natMX4</i>                                                                                                                                                                                                                                                                                                                                                                                                                            |
| <b>K537</b>   | K479 <i>zip1::LEU2/zip1::URA3</i> homozygous <i>mms4::natMX4</i>                                                                                                                                                                                                                                                                                                                                                                                               |
| <b>K542</b>   | K479 homozygous <i>yen1::hphMX4</i>                                                                                                                                                                                                                                                                                                                                                                                                                            |
| <b>K545</b>   | K457 homozygous <i>yen1::hphMX4</i>                                                                                                                                                                                                                                                                                                                                                                                                                            |
| <b>K548</b>   | K479 <i>zip1::LEU2/zip1::URA3</i> homozygous <i>yen1::hphMX4</i>                                                                                                                                                                                                                                                                                                                                                                                               |
| <b>K573</b>   | K479 homozygous <i>zip3::hphMX4</i>                                                                                                                                                                                                                                                                                                                                                                                                                            |
| <b>K576</b>   | K457 <i>zip3::hphMX4/zip3::kanMX4</i>                                                                                                                                                                                                                                                                                                                                                                                                                          |
| <b>K579</b>   | K479 <i>zip1::LEU2/zip1::URA3</i> homozygous <i>zip3::hphMX4</i>                                                                                                                                                                                                                                                                                                                                                                                               |
| <b>TY261</b>  | K479 homozygous <i>zip4::kanMX4</i>                                                                                                                                                                                                                                                                                                                                                                                                                            |
| <b>K458</b>   | K457 homozygous <i>zip4::kanMX4</i>                                                                                                                                                                                                                                                                                                                                                                                                                            |
| <b>TY522</b>  | TY521 homozygous <i>zip4::kanMX4</i>                                                                                                                                                                                                                                                                                                                                                                                                                           |

|               |                                                                             |
|---------------|-----------------------------------------------------------------------------|
| <b>K582</b>   | K479 homozygous <i>spo16::hphMX4</i>                                        |
| <b>K585</b>   | K457 homozygous <i>spo16::hphMX4</i>                                        |
| <b>K588</b>   | K479 <i>zip1::LEU2/zip1::URA3</i> homozygous <i>spo16::hphMX4</i>           |
| <b>K459</b>   | K479 homozygous <i>msh4::ADE2</i>                                           |
| <b>K486</b>   | K457 homozygous <i>msh4::ADE2</i>                                           |
| <b>K538</b>   | K479 homozygous <i>zip1::URA3 msh4::ADE2</i>                                |
| <b>K551</b>   | K479 homozygous <i>mlh3::hphMX4</i>                                         |
| <b>K554</b>   | K457 homozygous <i>mlh3::hphMX4</i>                                         |
| <b>K557</b>   | K479 <i>zip1::LEU2/zip1::URA3</i> homozygous <i>mlh3::hphMX4</i>            |
| <b>K487</b>   | K479 homozygous <i>zip4::kanMX4 msh4::ADE2</i>                              |
| <b>K488</b>   | K457 homozygous <i>zip4::kanMX4 msh4::ADE2</i>                              |
| <b>K491</b>   | K479 homozygous <i>zip1::LEU2 zip4::kanMX4 msh4::ADE2</i>                   |
| <b>K523</b>   | K479 homozygous <i>mms4::natMX4 msh4::ADE2</i>                              |
| <b>K524</b>   | K457 homozygous <i>mms4::natMX4 msh4::ADE2</i>                              |
| <b>K525</b>   | K479 homozygous <i>zip1::URA3 mms4::natMX4 msh4::ADE2</i>                   |
| <b>K618</b>   | K479 homozygous <i>zip4::kanMX4 mlh3::hphMX4</i>                            |
| <b>K621</b>   | K457 homozygous <i>zip4::kanMX4 mlh3::hphMX4</i>                            |
| <b>K624</b>   | K479 homozygous <i>zip1::LEU2 zip4::kanMX4 mlh3::hphMX4</i>                 |
| <b>AM3411</b> | CO9 homozygous <i>msh4::ADE2 MSH4-HA@URA3 ndt80::LEU2 ZIP3-MYC/ZIP3</i>     |
| <b>AM3412</b> | YAM1252 homozygous <i>msh4::ADE2 MSH4-HA@URA3 ndt80::LEU2 ZIP3-MYC/ZIP3</i> |
| <b>AM3413</b> | CO10 homozygous <i>msh4::ADE2 MSH4-HA@URA3 ndt80::LEU2 ZIP3-MYC/ZIP3</i>    |
| <b>K663</b>   | K479 homozygous <i>ndt80::hphMX4</i>                                        |
| <b>K666</b>   | K457 homozygous <i>ndt80::hphMX4</i>                                        |
| <b>K669</b>   | K479 <i>zip1::LEU2/zip1::URA3</i> homozygous <i>ndt80::hphMX4</i>           |
| <b>K672</b>   | K459 homozygous <i>ndt80::hphMX4</i>                                        |
| <b>K675</b>   | K486 homozygous <i>ndt80::hphMX4</i>                                        |
| <b>K678</b>   | K538 homozygous <i>ndt80::hphMX4</i>                                        |
